# Supplementary material
Source: ML conference proceedings conference paper supplement (https://openreview.net/forum?id=PYSfn5xXEe)
Supplement: supplementary_material [file attachment]

## 1 A Interpretation from Objective Functions

2 In this section, we provide proofs of the Onehot( $\cdot$ ) normalization function and the Scale( $\cdot$ ) normal-  
3 ization function from the perspective of objective functions.

### 4 A.1 Proof for Onehot Normalization

5 For  $K = 0$ , we choose the following objective function during training:

$$\begin{aligned} & \max \sum_{i=1}^c w_i \log P_i + M \left( \sum_{i=1}^c w_i S_i - 1 \right) \\ & s.t. \sum_i^c w_i = 1, w_i \geq 0. \end{aligned} \quad (1)$$

6 Introduce Lagrange multipliers  $\delta_i, i \in [1, c]$  and  $\gamma$  into Eq. 1, we have:

$$\mathcal{L} = \sum_{i=1}^c w_i \log P_i + M \left( \sum_{i=1}^c w_i S_i - 1 \right) + \gamma \left( 1 - \sum_{i=1}^c w_i \right) + \sum_{i=1}^c \delta_i w_i. \quad (2)$$

7 Combined with the Karush-Kuhn-Tucker (KKT) conditions, the optimal point should satisfy:

$$\log P_i + M S_i - \gamma + \delta_i = 0, \quad (3)$$

8

$$\sum_{i=1}^c w_i = 1, \delta_i \geq 0, w_i \geq 0, \delta_i w_i = 0. \quad (4)$$

9 Since  $S_i \in \{0, 1\}$ , we have  $M S_i = \log(e^M S_i + (1 - S_i))$ . The equivalent equation of Eq. 3 is:

$$\delta_i = \gamma - \log(e^M S_i + (1 - S_i)) P_i. \quad (5)$$

10 Combined with  $\delta_i \geq 0$  in Eq. 4, we have:

$$\gamma \geq \max_i (\log(e^M S_i + (1 - S_i)) P_i). \quad (6)$$

11  $\delta_i > 0$  is true if  $\gamma > \max_i (\log(e^M S_i + (1 - S_i)) P_i)$ . According to  $\delta_i w_i = 0$ , we always have  
12  $w_i = 0$ , which conflicts with  $\sum_{i=1}^c w_i = 1$ . Therefore, we get:

$$\gamma = \max_i (\log(e^M S_i + (1 - S_i)) P_i). \quad (7)$$

13 We assume that only one  $i_0 \in [1, c]$  reaches the maximum  $\gamma$ , then we have  $w_i = 0, i \in [1, c]/i_0$ .

14 Combined with  $\sum_{i=1}^c w_i = 1$ , we get  $w_{i_0} = 1$ . Therefore,  $w(x)$  should satisfy:

$$w(x) = \text{Onehot}(\log(e^M S(x) + (1 - S(x))) P(x)). \quad (8)$$

15 We mark  $\lambda = e^{-M}$  and convert Eq. 8 to its equivalent version:

$$w(x) = \text{Onehot}((S(x) + \lambda(1 - S(x))) P(x)). \quad (9)$$

### 16 A.2 Proof for Scale Normalization

17 For  $K > 0$ ,  $\log w_i$  ensures that  $w_i$  must be positive. Therefore, the constraint  $w_i \geq 0$  can be excluded.

18 Then, the objective function can be converted to:

$$\begin{aligned} & \max \sum_{i=1}^c w_i \log P_i + M \left( \sum_{i=1}^c w_i S_i - 1 \right) - K \sum_{i=1}^c w_i \log w_i \\ & s.t. \sum_i^c w_i = 1. \end{aligned} \quad (10)$$

19 Introduce the Lagrange multiplier  $\gamma$  in Eq. 10, we have:

$$\mathcal{L} = \sum_{i=1}^c w_i \log P_i + M \left( \sum_{i=1}^c w_i S_i - 1 \right) - K \sum_{i=1}^c w_i \log w_i + \gamma \left( 1 - \sum_{i=1}^c w_i \right). \quad (11)$$

20 Since the optimal point should satisfy  $\nabla_w \mathcal{L} = 0$ , we have:

$$\log P_i + M S_i - K (1 + \log w_i) - \gamma = 0. \quad (12)$$

21 Since  $S_i \in \{0, 1\}$ , we have  $M S_i = \log(e^M S_i + (1 - S_i))$ . The equivalent equation of Eq. 12 is:

$$\log(e^M S_i + (1 - S_i)) P_i - (K + \gamma) - K \log w_i = 0, \quad (13)$$

22

$$w_i^K = \frac{(e^M S_i + (1 - S_i)) P_i}{e^{K+\gamma}}. \quad (14)$$

23 We mark  $\lambda = e^{-M}$ . Then, we have:

$$w_i = \frac{((S_i + \lambda(1 - S_i)) P_i)^{1/K}}{e^{1+(\gamma-M)/K}}. \quad (15)$$

24 Since  $\sum_i^c w_i = 1$ , we have:

$$\sum_{i=1}^c \frac{((S_i + \lambda(1 - S_i)) P_i)^{1/K}}{e^{1+(\gamma-M)/K}} = 1, \quad (16)$$

25

$$e^{1+(\gamma-M)/K} = \sum_{i=1}^c ((S_i + \lambda(1 - S_i)) P_i)^{1/K}. \quad (17)$$

26 Combine Eq. 15 and Eq. 17 and we have:

$$w_i = \frac{((S_i + \lambda(1 - S_i)) P_i)^{1/K}}{\sum_{i=1}^c ((S_i + \lambda(1 - S_i)) P_i)^{1/K}}. \quad (18)$$

27 Combined with the definition of  $\text{Scale}(\cdot)$ , this equation can be converted to:

$$w(x) = \text{Scale}((S(x) + \lambda(1 - S(x))) P(x)). \quad (19)$$

## 28 B EM Perspective of ALIM

29 EM aims to maximize the likelihood of the dataset  $\mathcal{D}$ :

$$\begin{aligned} \max_{\theta} \sum_{x \in \mathcal{D}} \log P(x, S(x); \theta) &= \max_{\theta} \sum_{x \in \mathcal{D}} \log \sum_{i=1}^c P(x, S(x), y(x) = i; \theta) \\ &= \max_{\theta} \sum_{x \in \mathcal{D}} \log \sum_{i=1}^c w_i(x) \frac{P(x, S(x), y(x) = i; \theta)}{w_i(x)} \\ &\geq \max_{\theta} \sum_{x \in \mathcal{D}} \sum_{i=1}^c w_i(x) \log \frac{P(x, S(x), y(x) = i; \theta)}{w_i(x)}, \end{aligned} \quad (20)$$

30 where  $\theta$  is the trainable parameter. The last step of Eq. 20 utilizes Jensen's inequality. Since the  
31  $\log(\cdot)$  function is strictly concave, the equal sign takes when  $P(x, S(x), y(x) = i; \theta)/w_i(x)$  is some  
32 constant  $C$ , i.e.,

$$w_i(x) = \frac{1}{C} P(x, S(x), y(x) = i; \theta). \quad (21)$$

33 Considering that  $\sum_{i=1}^c w_i(x) = 1$ , we can further get:

$$C = \sum_{i=1}^c P(x, S(x), y(x) = i; \theta). \quad (22)$$

34 Then, we have:

$$w_i(x) = \frac{P(x, S(x), y(x) = i; \theta)}{\sum_{i=1}^c P(x, S(x), y(x) = i; \theta)} = \frac{P(x, S(x), y(x) = i; \theta)}{P(x, S(x); \theta)} = P(y(x) = i | x, S(x); \theta). \quad (23)$$

35 In the EM algorithm, the E-step aims to calculate  $w_i(x)$  and the M-step aims to maximize the lower  
36 bound of Eq. 20:

$$\begin{aligned} & \arg\max_{\theta} \sum_{x \in \mathcal{D}} \sum_{i=1}^c w_i(x) \log \frac{P(x, S(x), y(x) = i; \theta)}{w_i(x)} \\ &= \arg\max_{\theta} \sum_{x \in \mathcal{D}} \sum_{i=1}^c w_i(x) \log P(x, S(x), y(x) = i; \theta). \end{aligned} \quad (24)$$

37 **E-Step.** In this step, we aim to predict the ground-truth label for each sample:

$$\begin{aligned} w_i(x) = P(y(x) = i | x, S(x); \theta) &= \frac{P(S(x) | y(x) = i, x; \theta) P(y(x) = i | x; \theta)}{P(S(x) | x; \theta)} \\ &= \frac{P(S(x) | y(x) = i, x; \theta) P(y(x) = i | x; \theta)}{\sum_{i=1}^c P(S(x) | y(x) = i, x; \theta) P(y(x) = i | x; \theta)}. \end{aligned} \quad (25)$$

38 According to Assumption 1, we have:

$$P(S(x) | y(x), x) = \begin{cases} \alpha(x), & S_{y(x)}(x) = 1 \\ \beta(x), & S_{y(x)}(x) = 0. \end{cases} \quad (26)$$

39 It can be converted to:

$$P(S(x) | y(x), x) = \alpha(x) S_{y(x)}(x) + \beta(x) (1 - S_{y(x)}(x)). \quad (27)$$

40 Then, we get the equivalent equation of Eq. 25:

$$w_i(x) = \frac{(\alpha(x) S_i(x) + \beta(x) (1 - S_i(x))) P(y(x) = i | x; \theta)}{\sum_{i=1}^c (\alpha(x) S_i(x) + \beta(x) (1 - S_i(x))) P(y(x) = i | x; \theta)}. \quad (28)$$

41 We mark  $\lambda(x) = \beta(x)/\alpha(x)$  and  $P_i(x) = P(y(x) = i | x; \theta)$ . Then, we get:

$$w_i(x) = \frac{(S_i(x) + \lambda(x) (1 - S_i(x))) P_i(x)}{\sum_{i=1}^c (S_i(x) + \lambda(x) (1 - S_i(x))) P_i(x)}. \quad (29)$$

42 It connects traditional PLL and noisy PLL. In traditional PLL, we assume that the ground-truth label  
43 must be in the candidate set, i.e.,  $\beta(x) = 0$ . Since  $\lambda(x) = \beta(x)/\alpha(x) = 0$ , Eq. 29 degenerates to:

$$w_i(x) = \frac{S_i(x) P_i(x)}{\sum_{i=1}^c S_i(x) P_i(x)}, \quad (30)$$

44 which is identical to the classic PLL method, RC.

45 **M-Step.** The objective function of this step is:

$$\begin{aligned} & \arg\max_{\theta} \sum_{x \in \mathcal{D}} \sum_{i=1}^c w_i(x) \log P(x, S(x), y(x) = i; \theta) \\ &= \arg\max_{\theta} \sum_{x \in \mathcal{D}} \sum_{i=1}^c w_i(x) \log P(x; \theta) P(y(x) = i | x; \theta) P(S(x) | y(x) = i, x; \theta). \end{aligned} \quad (31)$$

46 Considering that  $P(x; \theta) = P(x)$  and  $P(S(x)|y(x) = i, x; \theta) = P(S(x)|y(x) = i, x)$ , the equivalent version of Eq. 31 is:

$$\arg\max_{\theta} \sum_{x \in \mathcal{D}} \sum_{i=1}^c w_i(x) \log P(y(x) = i|x; \theta). \quad (32)$$

48 Therefore, the essence of the M-step is to minimize the classification loss.

## 49 C Adaptively Adjusted $\lambda$

50 Since  $\eta$  controls the noise level of the dataset, we have:

$$P(S_{y(x)}(x) = 0) = \eta. \quad (33)$$

51 After the warm-up training, we assume that the predicted label generated by ALIM  $\hat{y}(x) = \arg \max_{1 \leq i \leq c} w_i(x)$  is accurate, i.e.,  $\hat{y}(x) = y(x)$ . Then we have:

$$P(S_{\hat{y}(x)}(x) = 0) = \eta. \quad (34)$$

53 To estimate the value of  $\lambda$ , we first study the equivalent meaning of  $S_{\hat{y}(x)}(x) = 0$ :

$$\max_{S_i(x)=0} (S_i(x) + \lambda(1 - S_i(x))) P_i(x) \geq \max_{S_i(x)=1} (S_i(x) + \lambda(1 - S_i(x))) P_i(x). \quad (35)$$

54 We simplify the left and right sides of Eq.35 as follows:

$$\begin{aligned} & \max_{S_i(x)=0} (S_i(x) + \lambda(1 - S_i(x))) P_i(x) & \max_{S_i(x)=1} (S_i(x) + \lambda(1 - S_i(x))) P_i(x) \\ & = \max_{S_i(x)=0} \lambda(1 - S_i(x)) P_i(x) & = \max_{S_i(x)=1} S_i(x) P_i(x) \\ & = \max_i \lambda(1 - S_i(x)) P_i(x), & = \max_i S_i(x) P_i(x). \end{aligned} \quad (36) \quad (37)$$

56 Then, we have:

$$\max_i \lambda(1 - S_i(x)) P_i(x) \geq \max_i S_i(x) P_i(x), \quad (38)$$

57

$$\lambda \geq \frac{\max_i S_i(x) P_i(x)}{\max_i (1 - S_i(x)) P_i(x)}. \quad (39)$$

58 Therefore,  $P(S_{\hat{y}(x)}(x) = 0) = \eta$  can be converted to:

$$P\left(\lambda \geq \frac{\max_i S_i(x) P_i(x)}{\max_i (1 - S_i(x)) P_i(x)}\right) = \eta. \quad (40)$$

59 It means that  $\lambda$  is the  $\eta$ -quantile of

$$\left\{ \frac{\max_i S_i(x) P_i(x)}{\max_i (1 - S_i(x)) P_i(x)} \right\}_{x \in \mathcal{D}}. \quad (41)$$
